# Supplementary material for: Treatment of Equine Tarsus Long Medial Collateral Ligament Desmitis with Allogenic Synovial Membrane Mesenchymal Stem/Stromal Cells Enhanced by Umbilical Cord Mesenchymal Stem/Stromal Cell-Derived Conditioned Medium: Proof of Concept
Source: MDPI journal article supplement (doi:10.3390/ani14030370), 2024-01-24
Supplement: s1 [file s1]

## SUPPLEMENTARY MATERIALS

**Table S1. Antibodies reagents used in eUC-MSC immunocytochemistry: marker, type, supplier, dilution, incubation period, positive control and cells of interest.**

| Marker              | Type/Clone          | Supplier             | Dilution /<br>Incubation<br>period | Antigen<br>unmasking | Positive<br>control        | Cells of interest            |
|---------------------|---------------------|----------------------|------------------------------------|----------------------|----------------------------|------------------------------|
| Vimentin            | Clone V9            | Dako<br>Denmark      | 1/500 ON                           | RS/WB                | Canine<br>mammary<br>gland | Mesenchymal/stromal<br>cells |
| Pan-<br>cytokeratin | Cocktail<br>AE1/AE3 | Thermo<br>Scientific | 1/300 ON                           | RS/WB                | Canine<br>mammary<br>gland | Epithelial cells             |
| CD31                | Clone<br>JC70A      | Dako<br>Denmark      | 1/50 ON                            | Pepsine              | Canine<br>spleen           | Endothelial cells            |

**Table S2. Average concentration of IL-6 and IL-8 in eUC-MSC CM.** Concentrations obtained with Multiplexing LASER Bead analysis (Eve Technologies, Calgary, AB, Canada). The average concentration for each interleukin in eUC-MSC was evaluated in triplicate. (nd – not determined)

| eUC      | IL-6<br>(pg/mL) | IL-8<br>(pg/mL) |
|----------|-----------------|-----------------|
| Sample 1 | 29.78667        | 13.15667        |
|          | 25.03667        | 13.02667        |
|          | 34.16667        | 15.95667        |
| Sample 2 | nd              | nd              |
